# Supplementary material
Source: PubMed Central journal article supplement (PMC6057893)
Supplement: BPH-175-3369-s001.pdf [file BPH-175-3369-s001.pdf]

## Supplementary information

### 1. Information regarding the weight of mice for experiment 1

Weights from mice randomly distributed into VEH + VEH, VEH + NTX, CBD + VEH or CBD + NTX groups are provided here. Animals were weighted prior water deprivation (day 0 of the experiment). As observed, after water deprivation, no behavioural or physical decline was observed. The body weight fluctuation was never higher than 10%. Moreover, weights were monitored throughout the oral self-administration procedure. The last time point corresponds to the day before drug administration:

| Day 0        |              |              |              | Day 14       |              |              |              |
|--------------|--------------|--------------|--------------|--------------|--------------|--------------|--------------|
| VEH          | NTX          | CBD          | CBD+NTX      | VEH          | NTX          | CBD          | CBD+NTX      |
| 15           | 15           | 15,5         | 16,5         | 16,5         | 16           | 15           | 17,5         |
| 17           | 16           | 16           | 17           | 17,5         | 17,5         | 15,5         | 15,5         |
| 14,5         | 14,5         | 14,5         | 17           | 14,5         | 14,5         | 16           | 16,5         |
| 16           | 16,5         | 16,5         | 16,5         | 16,5         | 15           | 17,5         | 16,5         |
| 15,5         | 16,5         | 16           | 15,5         | 16,5         | 16,5         | 17           | 15,5         |
| 16           | 15           | 15,5         | 15           | 16           | 16           | 16           | 15           |
| 16           | 16,5         | 16           | 14,5         | 16           | 15,5         | 17           | 13           |
| 17,5         | 16,5         | 16           | 16,5         | 17,5         | 15,5         | 16,5         | 16,5         |
| 15           | 17           | 18           | 16           | 17           | 17,5         | 18,5         | 15,5         |
| 15           | 15,5         | 17,5         | 17           | 16,5         | 16,5         | 15,5         | 19           |
| 16,5         | 15           | 15,5         | 16,5         | 15           | 16,5         | 14           | 14,5         |
| <b>15,82</b> | <b>15,82</b> | <b>16,09</b> | <b>16,18</b> | <b>16,32</b> | <b>16,09</b> | <b>16,23</b> | <b>15,91</b> |

  

| Day 1        |              |              |              | Day 24       |              |              |              |
|--------------|--------------|--------------|--------------|--------------|--------------|--------------|--------------|
| VEH          | NTX          | CBD          | CBD+NTX      | VEH          | NTX          | CBD          | CBD+NTX      |
| 16           | 15,5         | 15           | 17,5         | 16,5         | 17,5         | 18           | 19           |
| 17,5         | 16,5         | 16,5         | 17           | 19           | 17,5         | 19,5         | 18           |
| 14,5         | 16           | 15           | 18           | 17           | 18           | 16,5         | 18,5         |
| 15,5         | 17           | 17,5         | 16,5         | 18,5         | 19,5         | 17,5         | 18,5         |
| 16           | 17           | 16           | 15,5         | 19           | 18,5         | 17,5         | 17           |
| 16,5         | 14,5         | 16           | 14,5         | 16,5         | 18,5         | 18           | 16,5         |
| 16           | 17           | 16,5         | 14           | 17,5         | 19           | 17,5         | 15           |
| 17,5         | 16,5         | 16           | 16,5         | 18,5         | 17,5         | 17           | 17,5         |
| 14,5         | 18,5         | 18           | 16,5         | 18,5         | 18,5         | 19           | 17           |
| 15           | 15,5         | 17           | 19           | 17           | 16           | 18           | 20,5         |
| 17,5         | 14           | 16           | 17           | 14,5         | 15           | 18,5         | 16           |
| <b>16,05</b> | <b>16,18</b> | <b>16,32</b> | <b>16,55</b> | <b>17,50</b> | <b>17,77</b> | <b>17,91</b> | <b>17,59</b> |

  

| Day 6        |              |              |              | Day 34       |              |              |              |
|--------------|--------------|--------------|--------------|--------------|--------------|--------------|--------------|
| VEH          | NTX          | CBD          | CBD+NTX      | VEH          | NTX          | CBD          | CBD+NTX      |
| 16,5         | 15           | 16           | 17,5         | 17,5         | 18           | 18,5         | 20,5         |
| 17,5         | 16,5         | 17,5         | 15,5         | 19           | 18,5         | 18           | 19           |
| 15,5         | 16           | 14,5         | 16,5         | 18           | 18           | 17,5         | 19           |
| 16,5         | 17           | 15,5         | 16,5         | 18,5         | 20           | 18,5         | 18,5         |
| 16,5         | 17           | 16,5         | 15,5         | 18,5         | 20           | 18           | 18           |
| 16           | 16           | 15,5         | 15           | 18           | 19           | 19,5         | 17,5         |
| 16,5         | 17           | 17,5         | 13           | 18           | 20           | 17,5         | 16           |
| 15           | 16,5         | 16,5         | 16,5         | 19           | 18           | 17           | 19           |
| 16,5         | 18,5         | 16,5         | 15,5         | 19           | 19,5         | 19,5         | 18           |
| 15,5         | 15,5         | 16,5         | 19           | 18           | 16,5         | 18,5         | 21,5         |
| 17           | 14           | 17,5         | 17           | 15           | 17,5         | 19           | 16,5         |
| <b>16,27</b> | <b>16,27</b> | <b>16,36</b> | <b>16,14</b> | <b>18,05</b> | <b>18,64</b> | <b>18,32</b> | <b>18,50</b> |

## 2. Information regarding the weight of mice for experiment 2

Weights from mice randomly distributed into VEH1 + VEH2 + VEH3, WAY + VEH2 + VEH3, WAY + CBD + NTX or VEH1 + CBD + NTX groups are provided here. Animals were weighted the day of the 24-hour water deprivation (day 0) and on the following day. As observed, after water deprivation, no behavioural or physical decline was observed. The body weight fluctuation was never higher than 10%. In addition, mice were again weighted the day before starting drug administration:

| Day 0          |               |              |              |
|----------------|---------------|--------------|--------------|
| VEH1+VEH2+VEH3 | WAY+VEH2+VEH3 | WAY+CBD+NTX  | VEH+CBD+NTX  |
| 17             | 16,50         | 19,50        | 18,50        |
| 16             | 17,50         | 16,50        | 17,50        |
| 16,50          | 17,50         | 17,50        | 17,50        |
| 17             | 18,50         | 16,50        | 18           |
| 17             | 19            | 18,50        | 15,50        |
| 18             | 17,50         | 15,50        | 17,50        |
| 14             | 16            | 18           | 16,50        |
| 14,50          | 16            | 16           | 16           |
| 17,50          | 17,50         | 18           | 16           |
| 15,50          | 16,50         | 17,50        | 19,50        |
| <b>16,30</b>   | <b>17,25</b>  | <b>17,35</b> | <b>17,25</b> |

| Day 1          |               |              |              |
|----------------|---------------|--------------|--------------|
| VEH1+VEH2+VEH3 | WAY+VEH2+VEH3 | WAY+CBD+NTX  | VEH+CBD+NTX  |
| 17             | 17            | 18,50        | 18,50        |
| 16             | 17,50         | 17           | 17,50        |
| 16             | 17            | 17           | 17           |
| 17,50          | 18            | 16,50        | 18           |
| 17,50          | 18,50         | 18           | 16,50        |
| 17,50          | 18            | 16,50        | 17,50        |
| 15             | 16,50         | 18,50        | 16,50        |
| 15             | 15,50         | 16,50        | 16           |
| 17,50          | 17,50         | 18,50        | 16,50        |
| 16             | 16,50         | 17,50        | 19,50        |
| <b>16,50</b>   | <b>17,20</b>  | <b>17,45</b> | <b>17,35</b> |

| Day 34         |               |              |              |
|----------------|---------------|--------------|--------------|
| VEH1+VEH2+VEH3 | WAY+VEH2+VEH3 | WAY+CBD+NTX  | VEH+CBD+NTX  |
| 18,50          | 19,50         | 21,50        | 20           |
| 18             | 18,50         | 18,50        | 18           |
| 20             | 18,50         | 20           | 19           |
| 20             | 20            | 17,50        | 19           |
| 19,50          | 20            | 19,50        | 18           |
| 20,50          | 18,50         | 18           | 21           |
| 17,50          | 18            | 19           | 19           |
| 17,50          | 19,50         | 17           | 18,50        |
| 18,50          | 19,50         | 17,50        | 18           |
| 17,50          | 17            | 19           | 19           |
| <b>18,75</b>   | <b>18,90</b>  | <b>18,75</b> | <b>18,95</b> |
